# Supplementary material
Source: PubMed Central journal article supplement (PMC2894011)
Supplement: NIHMS30456-supplement-1.pdf [file NIHMS30456-supplement-1.pdf]

# Dynamin I phosphorylation by GSK3 controls activity-dependent bulk endocytosis of synaptic vesicles

Clayton E.L., Sue N., Smillie K.J., O'Leary T., Bache N., Cheung G., Cole, A.R.,  
Wyllie D.J, Sutherland C., Robinson P.J. and Cousin M.A

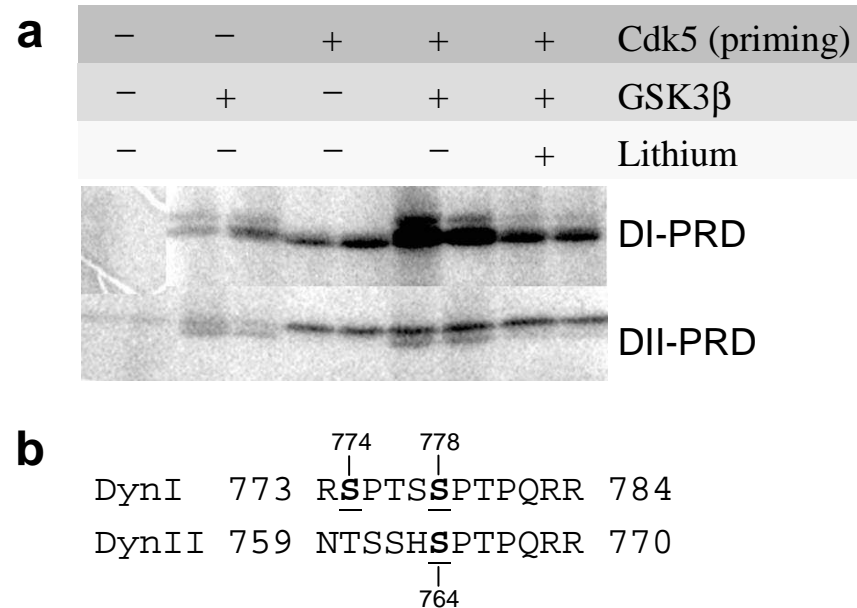

**Supplementary Figure 1 - Dynamin II is not phosphorylated by GSK3 $\beta$ .**

**a)** DynI-PRD and DynII-PRD were treated in an identical manner to Figure 1**b** and visualized by autoradiography (upper panel). No GSK3 $\beta$ -dependent phosphorylation of DynII-PRD was observed. **b)** Partial amino acid sequence alignment of dynamin I and II is shown (lower panel). Note that while Ser-778 is conserved in the amino acid sequence of dynamin II (Ser-764), Ser-774 is not. Results are shown in duplicate.

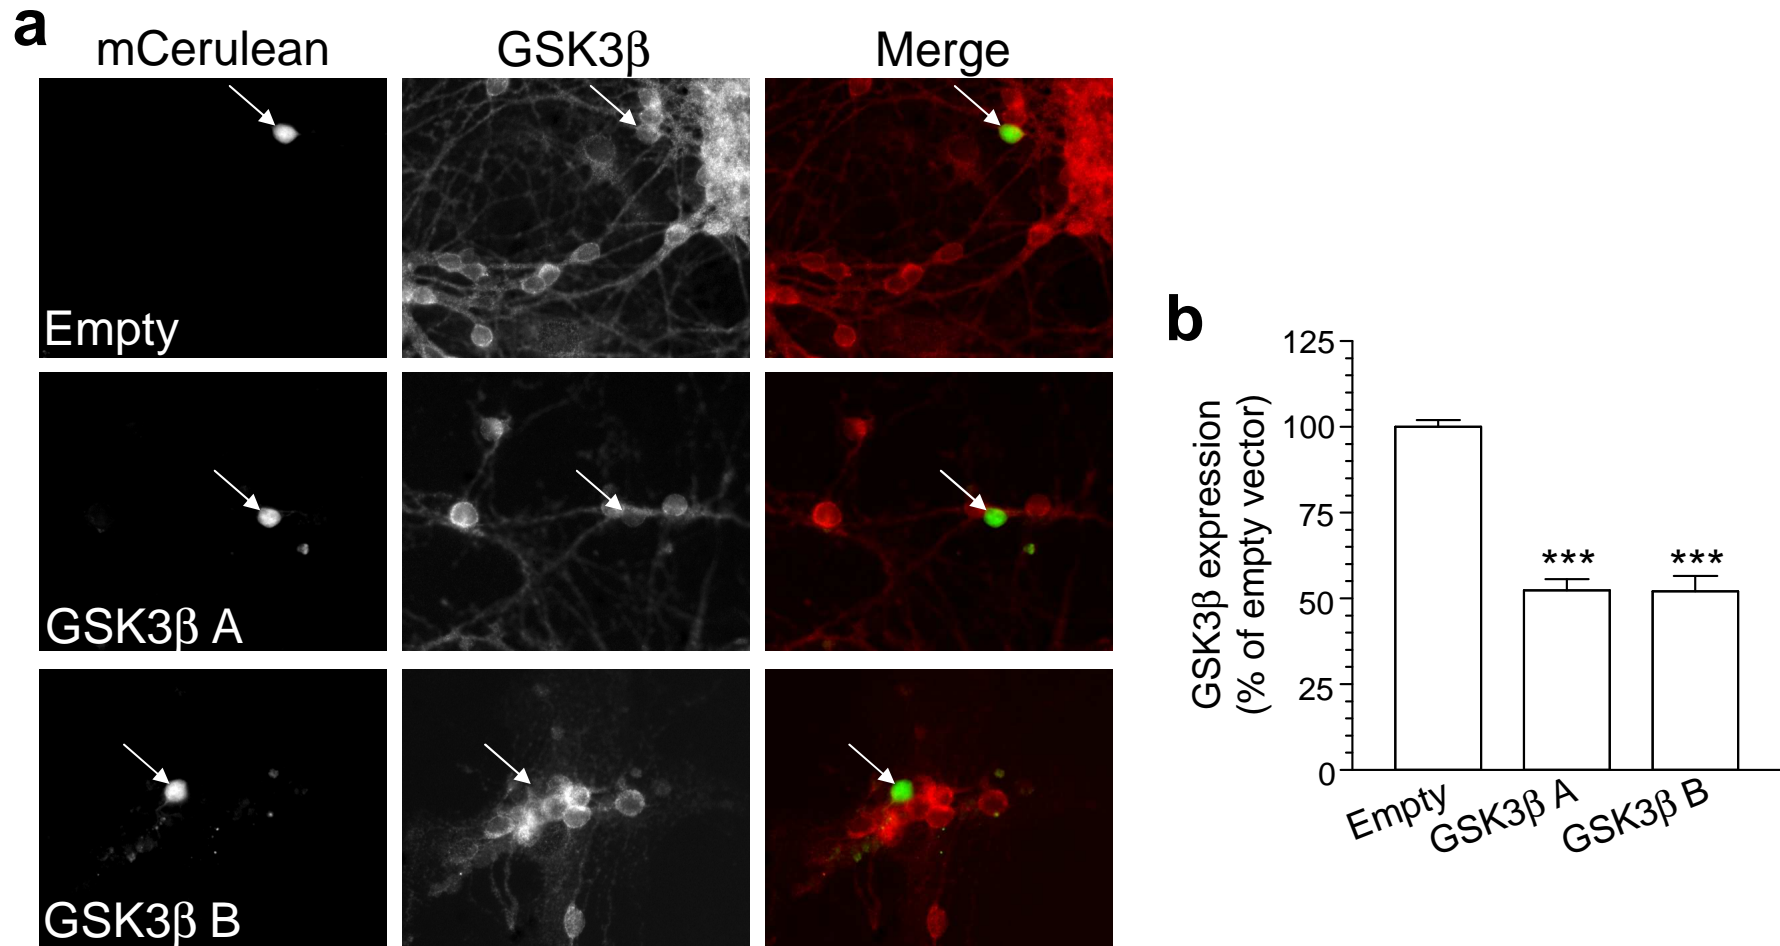

**Supplementary Figure 2 - Knockdown of GSK3 $\beta$  expression in granule neuron cultures** **a)** Granule neuron cultures were transfected with shRNA against GSK3 $\beta$  or empty shRNA vector. After 72 hours GSK3 $\beta$  expression was quantified using immunofluorescence. Left panels show transfected neurones with either empty shRNA vector, GSK3 $\beta$  A or GSK3 $\beta$  B oligos. Middle panels show GSK3 $\beta$  expression. Right panels show a merged image with transfected neuron in green and GSK3 $\beta$  in red. Arrows highlight GSK3 $\beta$  expression levels in transfected neurones. **b)** Quantification of GSK3 $\beta$  knockdown in the cell body of shRNA expressing neurones. (n = 6 Ctrl, n = 4 GSK3 $\beta$  A, n = 3 GSK3 $\beta$  B  $\pm$  SEM, \*\*\* = p < 0.001, one-way ANOVA).

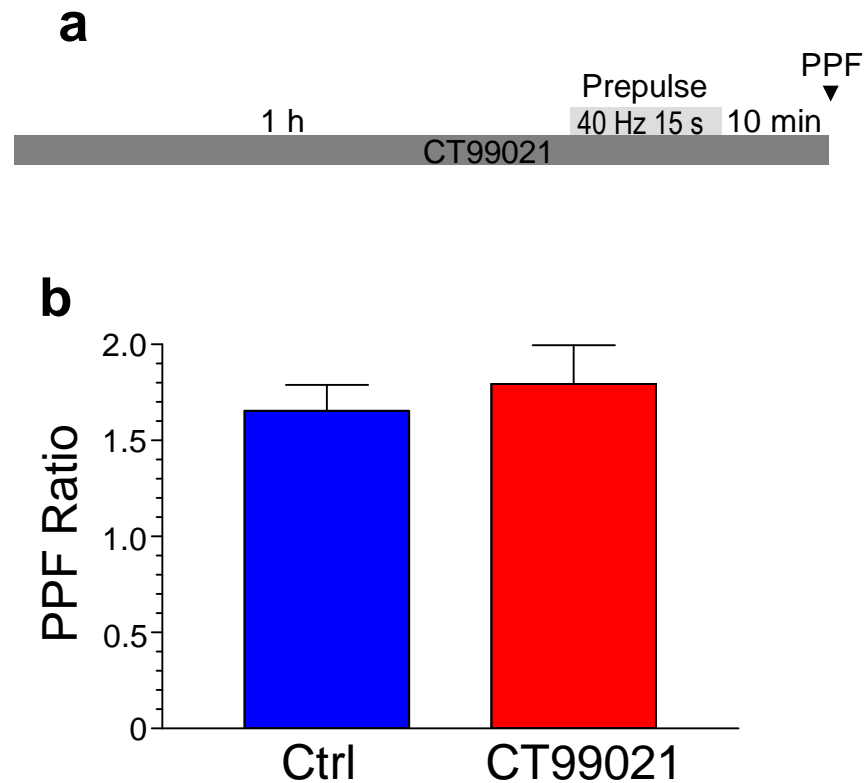

**Supplementary Figure 3 - Inhibition of GSK3 does not affect SV release probability.** **a)** Hippocampal slices were incubated with or without CT99021 (2 mM) for 1 hour before being transferred to the recording chamber. Slices were challenged with a prepulse of 600 action potentials (40 Hz) 10 minutes before recording. Paired pulse facilitation (PPF) was recorded in slices challenged with 2 stimuli separated by 25 milliseconds (indicated by arrowhead). **b)** Bar graph displays the PPF ratio (EPSC amplitude for second stimulus / first stimulus) for slices where CT99021 (2 mM) was only present in the pipette-filling solution (Control, Ctrl) or where CT99021 (2 mM) was also included in the external recording solution (CT99021). N = 7 for Ctrl, n = 11 for CT99021, Student's t test, p = 0.58.

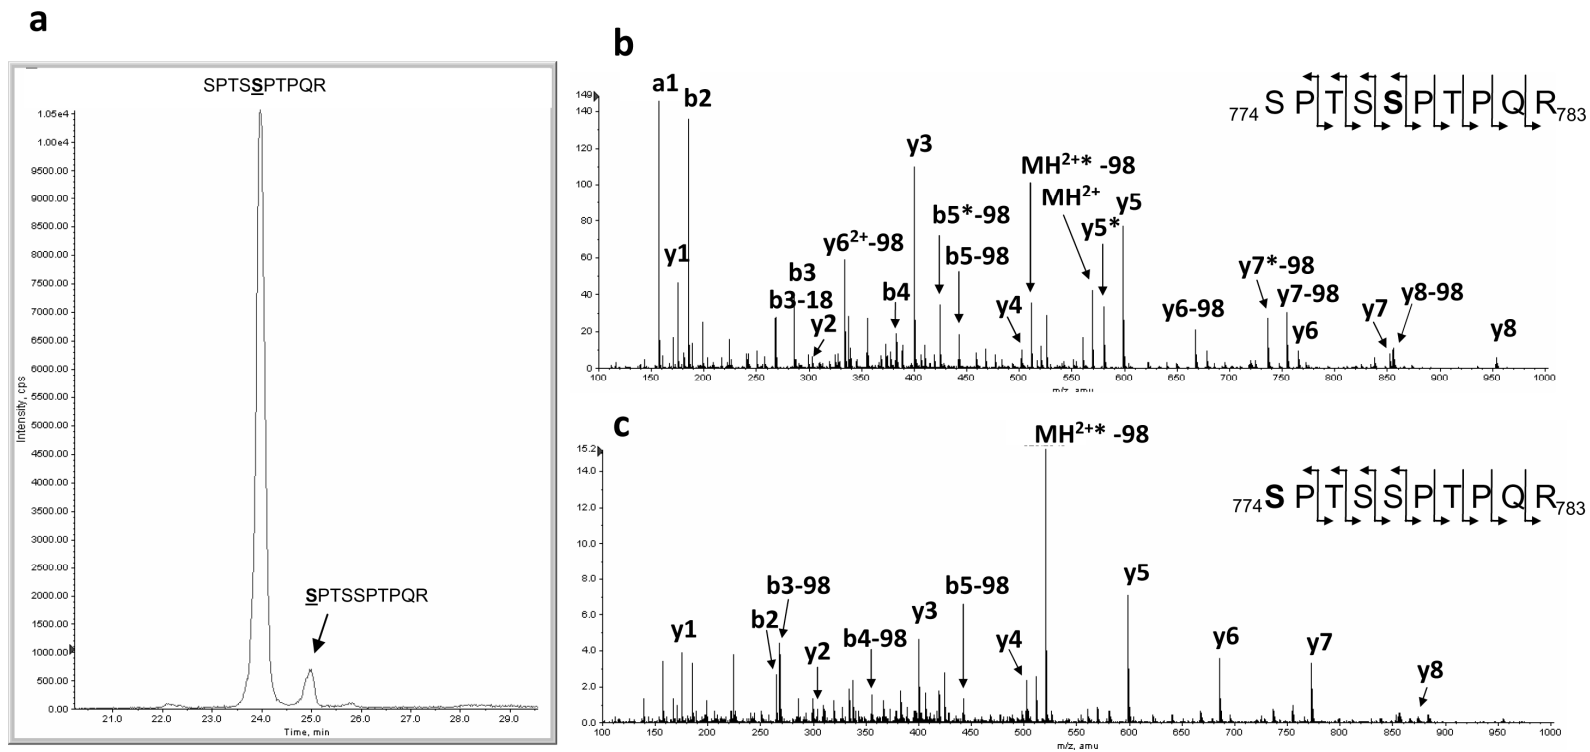

**Supplementary Figure 4 - *In-vitro* phosphorylation of dynamin I PRD with *cdk5* for 10 minutes yields predominantly mono-phosphorylated 778.** DynI-PRD was phosphorylated with *cdk5* for 10 minutes using the same assay conditions in Figure 1. **a)** Extracted ion chromatogram of the mono-phosphorylated peptide SPTSSPTPQR and the area under the chromatographic peak indicates their abundance. The peptide phosphorylated on S778 elutes before the peptide phosphorylated on S774. **b)** The MS/MS spectrum and identity of the first chromatographic peak matching the peptide phosphorylated on S778 and **c)** The MS/MS spectrum and identity of the second chromatographic peak matching the peptide phosphorylated on S774. Bold “S” indicates the phosphorylated Serine, “-98” indicates the neutral loss of H<sub>3</sub>PO<sub>4</sub> from the phosphorylated fragment ion and \* indicates the neutral loss of H<sub>2</sub>O.

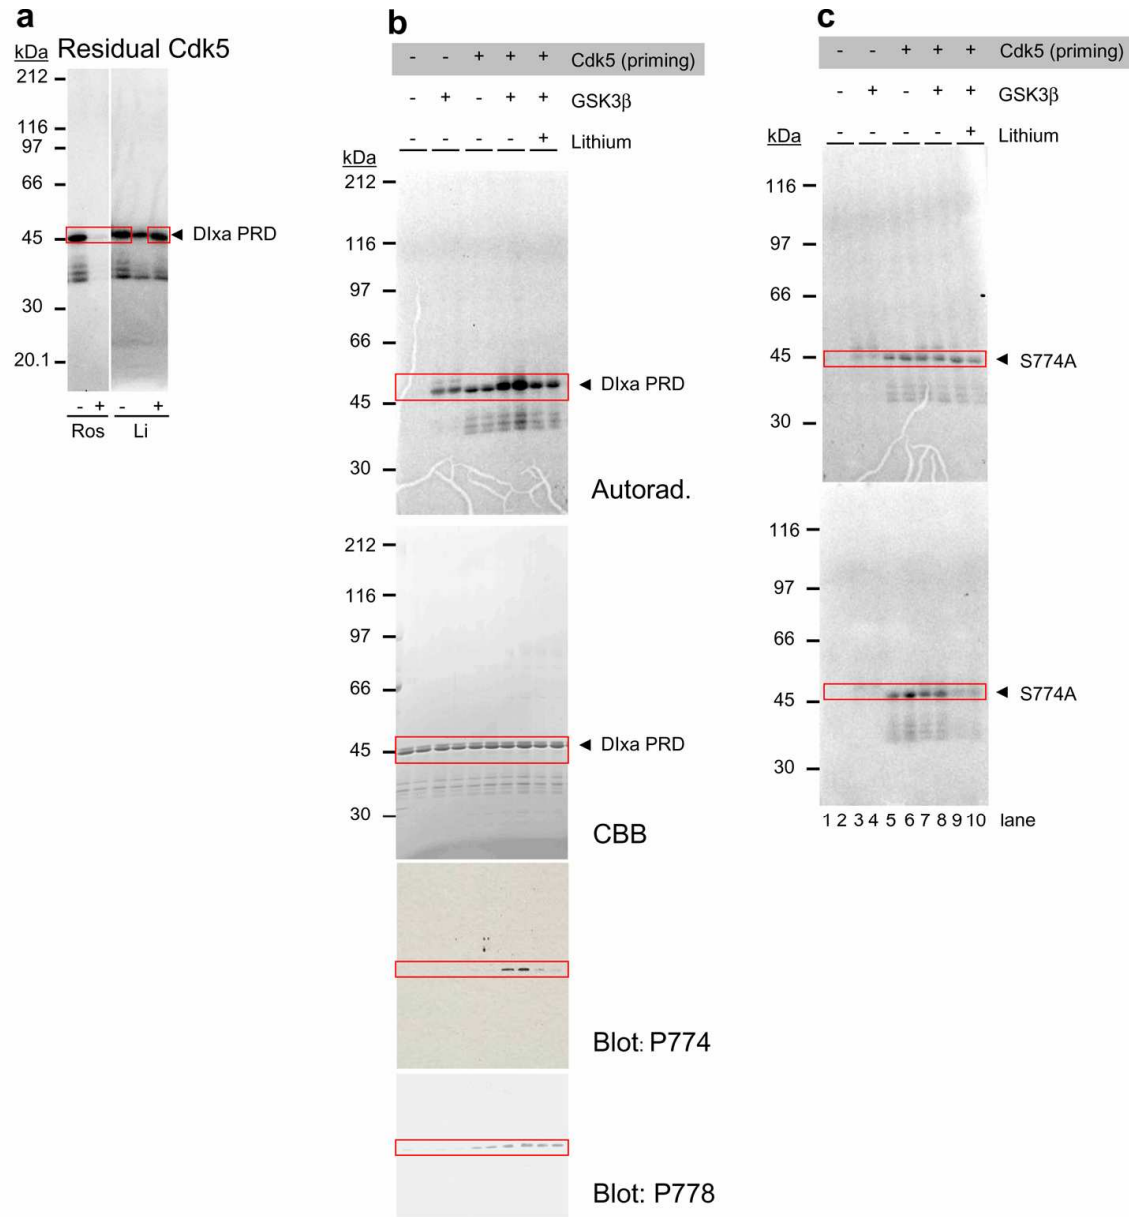

**Supplementary Figure 5** – Full length gels, autorads and Western blots for Figure 1. Experimental protocols were performed as described in figure 1. Original blots are displayed. Red boxes indicate the region selected for Figure 1.

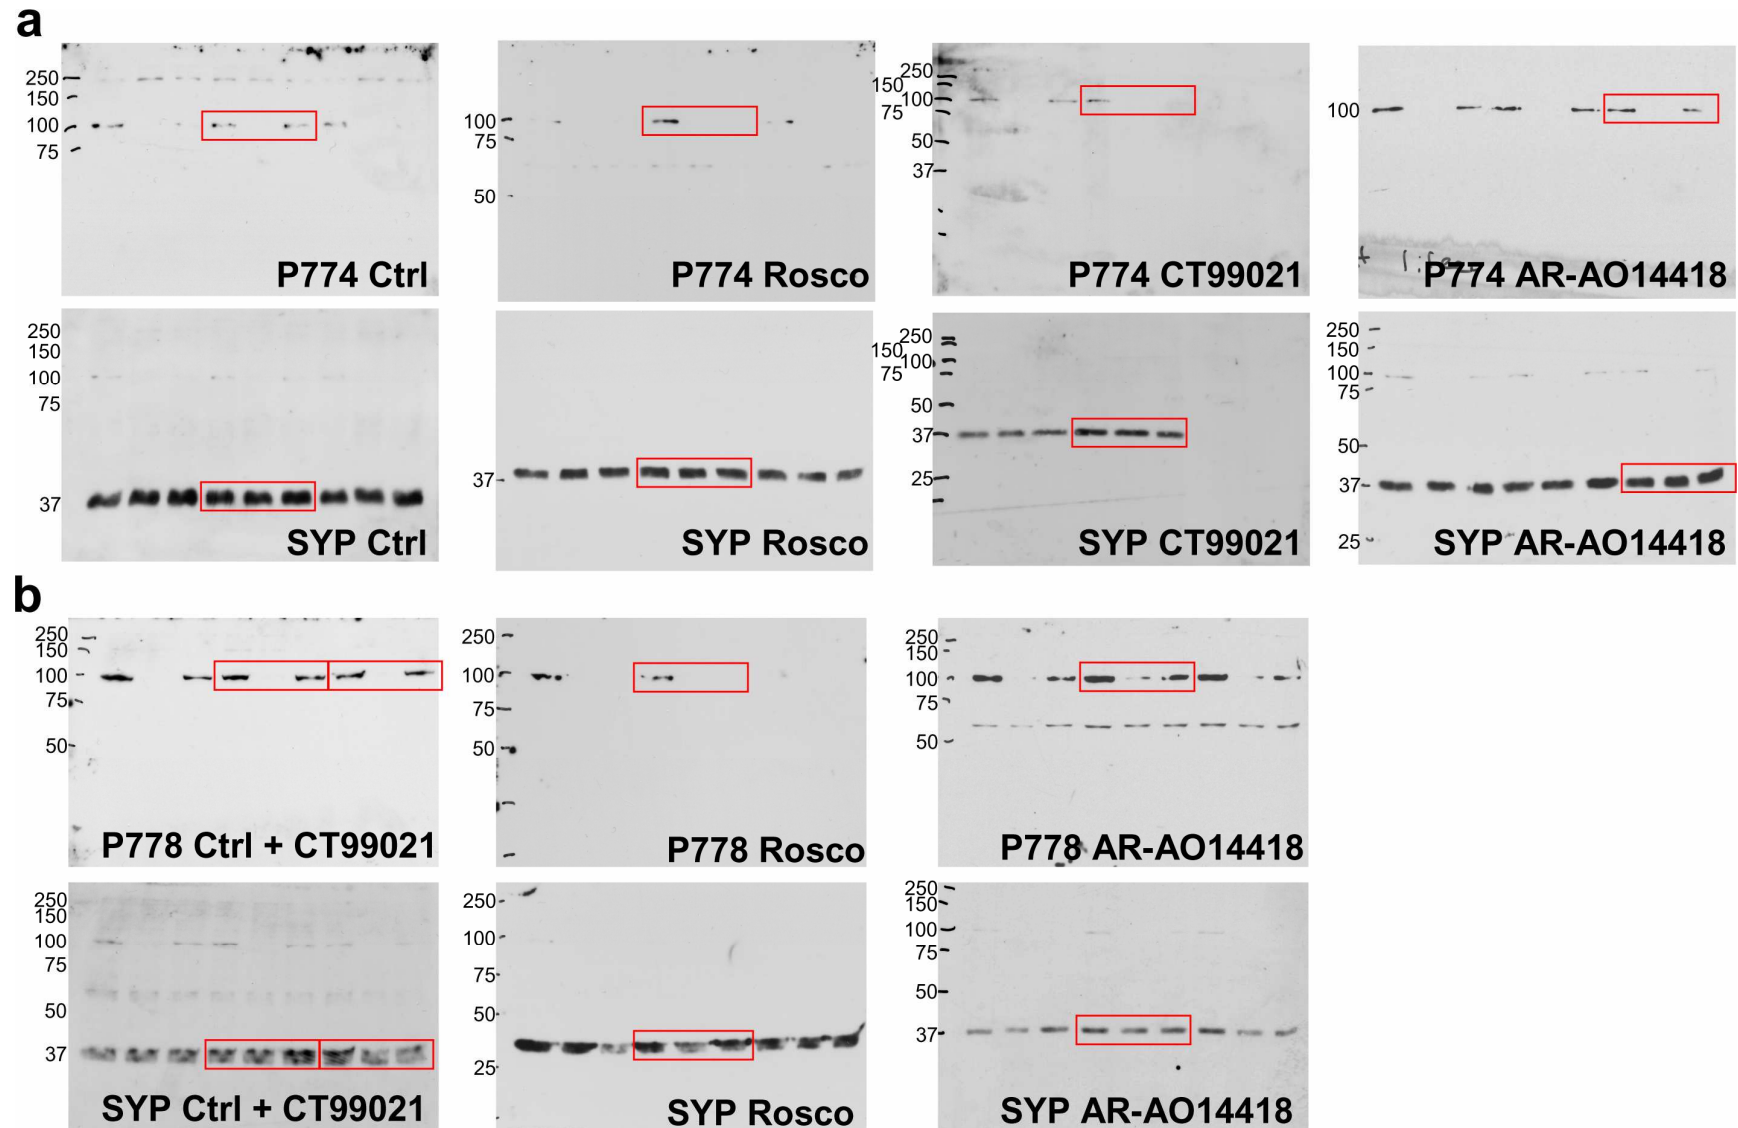

**Supplementary Figure 6** – Full length Western blots for Figure 2. Experimental protocols were performed as described in figure 2. Original blots are displayed showing either **a**) serine 774 phosphorylation (P-774) or **b**) serine 778 phosphorylation (P-778). Membranes were then reprobed for the presence of synaptophysin (SYP) as a loading control. Red boxes indicate the region selected for Figure 2.
